# Supplementary material
Source: HighWire-hosted journal article supplement (https://www.cmajopen.ca/highwire/filestream/80943/field_highwire_adjunct_files/0/open-2016-0057-1-at.pdf)
Supplement: open-2016-0057-1-at.pdf [file open-2016-0057-1-at.pdf]

**Appendix 1 (as supplied by the authors):** Table S1. Summary of administrative health care databases

| Database                                                                                                          | Description                                                                                                                                                                                                                                                                   |
|-------------------------------------------------------------------------------------------------------------------|-------------------------------------------------------------------------------------------------------------------------------------------------------------------------------------------------------------------------------------------------------------------------------|
| Canadian Institute for Health Information (CIHI)-Discharge Abstract Database (DAD)                                | The CIHI-DAD is a national database that contains demographic, clinical, and administrative data for acute inpatient hospital hospitalizations.                                                                                                                               |
| CIHI-National Ambulatory Care Reporting System (NACRS)                                                            | The CIHI-NACRS contains data for all ambulatory care including emergency department visits, and day surgery outpatient clinics.                                                                                                                                               |
| National Rehabilitation Reporting System (NRS)                                                                    | The NRS contains national data on rehabilitation facilities and clients, collected from participating adult inpatient rehabilitation facilities and programs.                                                                                                                 |
| Ontario Drug Benefit (ODB)                                                                                        | The ODB program includes data on all drugs dispensed in community pharmacies and long-term care/nursing facilities. The ODB program covers all seniors in Ontario (aged 65 and over) and those on social assistance for all prescriptions listed in the provincial formulary. |
| Ontario Health Insurance Plan (OHIP)                                                                              | The OHIP data cover all services and procedures provided by health care providers who can claim under OHIP (physicians, laboratory services).                                                                                                                                 |
| Home Care Database (HCD)                                                                                          | The HCD provides data on government-funded services coordinated by Ontario's Community Care Access Centres (CCAC), for individuals requiring home care.                                                                                                                       |
| Continuing Care Reporting System (CCRS)                                                                           | The CCRS contains clinical and demographic information on individuals receiving facility-based continuing care. These services include medical long-term care, rehabilitation, geriatric assessment, respite care, and palliative care, and nursing home care.                |
| Client Profile Database (CPRO) (for 2003-2010)<br><br>Continuing Care Reporting System (CCRS) (from 2010 onwards) | The CPRO provides the date of admission to LTC facilities from 2003 through 2010, while the CCRS provides admission and discharge dates from 2010 onwards.                                                                                                                    |
| Ontario Mental Health Reporting System (OMHRS)                                                                    | The OMHRS collects, analyzes and reports on information about individuals admitted to designated adult mental health beds in Ontario. Some mental health patients are recorded in the CIHI-DAD.                                                                               |
| Assistive Devices Program (ADP)                                                                                   | The ADP is a program operated by the Ministry of Health that provides consumer support and funding to Ontario residents who have long-term physical disabilities.                                                                                                             |
